# Supplementary material for: Synthesis and properties of D–A copolymers based on dithienopyrrole and benzothiadiazole with various numbers of thienyl units as spacers
Source: Royal Society of Chemistry journal article supplement (doi:10.1039/c4py00975d), 2014-01-01
Supplement: c4py00975d1.pdf [file c4py00975d1.pdf]

## Supporting information

### **Synthesis and Properties of D-A Copolymers Based on Dithienopyrrole and Benzothiadiazole with Various Number of Thienyl Units as Spacer**

**Yanfang Geng,<sup>a</sup> Junzi Cong,<sup>b</sup> Keisuke Tajima,<sup>\*b</sup> Qingdao Zeng<sup>a</sup> and Erjun Zhou<sup>\*a</sup>**

<sup>a</sup> National Center for Nanoscience and Technology, No. 11 Beiyitiao, Zhongguancun, Beijing 100190, P. R. China.  
E-mail: [zhouej@nanoctr.cn](mailto:zhouej@nanoctr.cn)

<sup>b</sup> Emergent Functional Polymers Research Team, RIKEN Center for Emergent Matter Science (CEMS), 2-1 Hirosawa, Wako 351-0198, Japan. E-mail: [keisuke.tajima@riken.jp](mailto:keisuke.tajima@riken.jp)

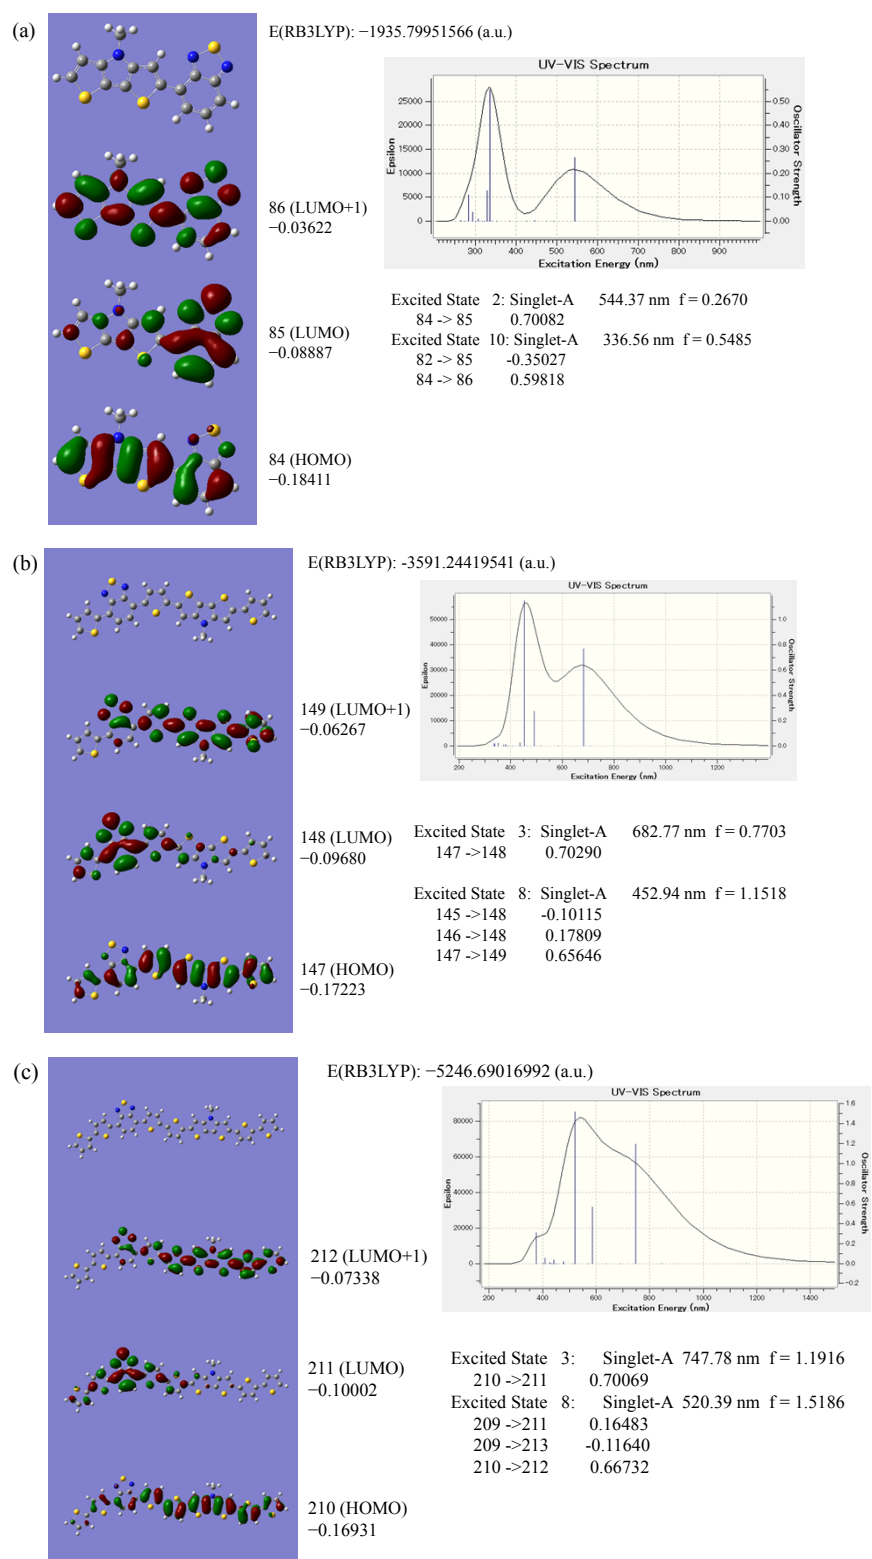

**Figure S1.** Summary of DFT and TD-DFT calculations on a model compound for (a) PDTP-BT, (b) PDTP-DTBT and (c) PDTP-DT2BT. Only the major orbitals and the transitions are shown. The optimization of the chemical structure was carried out in Gaussian 09 with a basis set of B3LYP/6-31G(d).

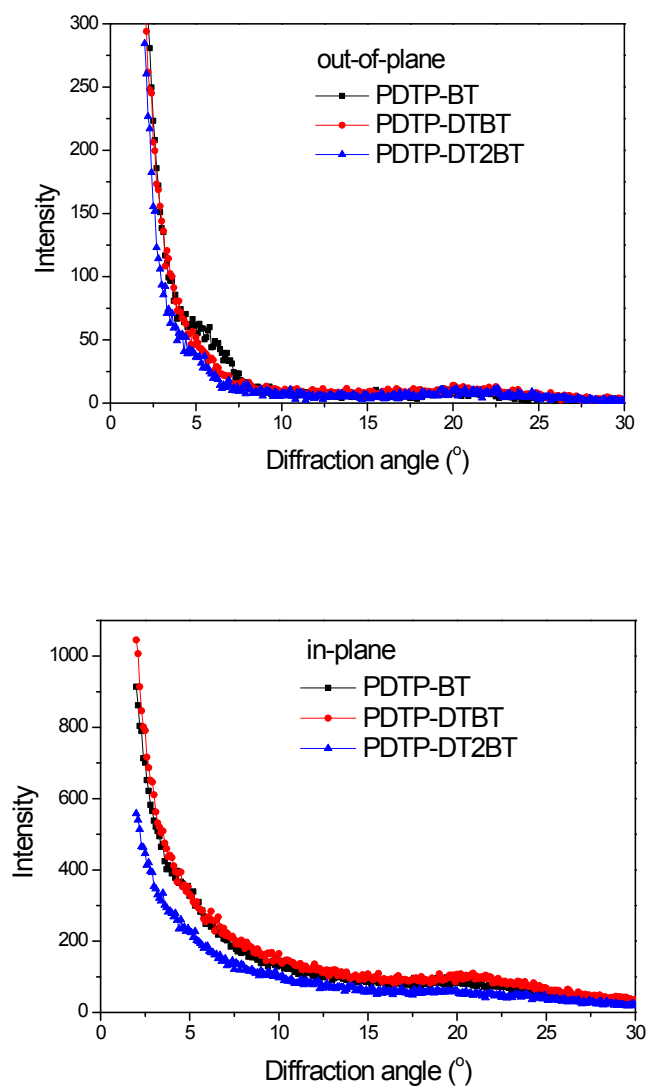

**Figure S2.** XRD patterns of three polymers in thin films with out-of-plane (top) and in-plane (bottom) configurations.
